1 Evidence-based XAI of clinical decision support systems for  
2 differential diagnosis: Design, implementation, and evaluation

3  
4 Yasuhiko Miyachi <sup>2\*</sup>, Osamu Ishii <sup>2</sup>, Keijiro Torigoe M.D.<sup>1,2</sup>

5  
6 <sup>1</sup> Torigoe Clinic, Ibara, Okayama, Japan

7 <sup>2</sup> The Society for Computer-aided Clinical Decision Support System,  
8 c/o Torigoe Clinic, Ibara, Okayama, Japan

9  
10 \* Corresponding author

11 E-mail: ai.diagnosis.2021@gmail.com (YM)

12  
13 All authors contributed equally to this work.

## 16 Abstract

17 **Introduction:** We propose the Explainable AI (XAI) model for Clinical Decision Support Systems (CDSSs).  
18 It supports physician's Differential Diagnosis (DDx) with Evidence-based Medicine (EBM). It identifies  
19 instances of the case data contributing to predicted diseases. Each case data is linked to the sourced  
20 medical literature. Therefore, this model can provide medical professionals with evidence of predicted  
21 diseases.

22 **Methods:** The source of the case data (training data) is medical literature. The prediction model (the  
23 main model) uses Neural Network (NN) + Learning To Rank (LTR). Physicians' DDx and machines' LTR are  
24 remarkably similar. The XAI model (the surrogate model) uses k-Nearest Neighbors Surrogate model (k-  
25 NN Surrogate model). The k-NN Surrogate model is a symphony of Example-based explanations, Local  
26 surrogate model, and k-Nearest Neighbors (k-NN). Requirements of the XAI for CDSS and features of the  
27 XAI model are remarkably adaptable. To improve the surrogate model's performance, it performs  
28 "Selecting its data closest to the main model." We evaluated the prediction and XAI performance of the  
29 models.

30 **Results:** With the effect of "Selecting," the surrogate model's prediction and XAI performances are  
31 higher than those of the "standalone" surrogate model.

32 **Conclusions:** The k-NN Surrogate model is a useful XAI model for CDSS.

33 For CDSSs with similar aims and features, the k-NN Surrogate model is helpful and easy to implement.

34 The k-NN Surrogate model is an Evidence-based XAI for CDSSs.

35 Unlike current commercial Large Language Models (LLMs), Our CDSS shows evidence of predicted  
36 diseases to medical professionals.

37

## 38 Keywords

39 Clinical Decision Support System (CDSS), Differential Diagnosis (DDx), Diagnostic errors, Diagnostic  
40 uncertainty, Evidence-Based Medicine (EBM), Artificial Intelligence (AI), Explainable Artificial Intelligence  
41 (XAI), Example-based explanations, Surrogate model, Neural Network (NN), Learning To Rank (LTR), k-  
42 Nearest Neighbors (k-NN)

43

44

45 Introduction

46 Clinical Decision Support System

47 Clinical Decision Support Systems (CDSSs) aim to improve medical care quality. CDSSs support medical  
48 decisions with clinical knowledge, patient information, and other medical information. (1)

49 The summaries of this article's CDSS are as follows:

50 - Objectives

51 - To support Differential Diagnosis (DDx) by physicians and general practitioners.

52 - To prevent diagnostic errors for medical professionals.

53 - To reduce diagnostic uncertainty

54 - Medical literature, metadata, and case data

55 Medical literature (textbooks, original articles, case reports, etc.) is a source of metadata and case  
56 data.

57 Metadata (bibliographic and disease-related information) is obtained from medical literature by  
58 text-mining.

59 Case data (symptoms and diseases) is obtained from the metadata by coding. It is used for training  
60 and test of the models.

61 Symptoms include signs and symptoms, laboratory and imaging test results, etc. (defined as  
62 "symptoms" from now on).

63 Diseases include confirmed diseases, differential diseases, and their scores.

64 - Prediction model

65 A medical professional inputs the patient's symptoms.

66 The CDSS outputs predicted diseases by Artificial Intelligence (AI).

67 Predicted diseases are a ranking list of diseases. (2)

68 - XAI model

69 The CDSS outputs evidence of predicted diseases by Explainable AI (XAI).

70 Evidence is the metadata of the case data contributing to predicted diseases. (3), (4)

71

72 Our CDSS is open to medical professionals on the Internet. (5) (See: Fig 1, S Table 1)

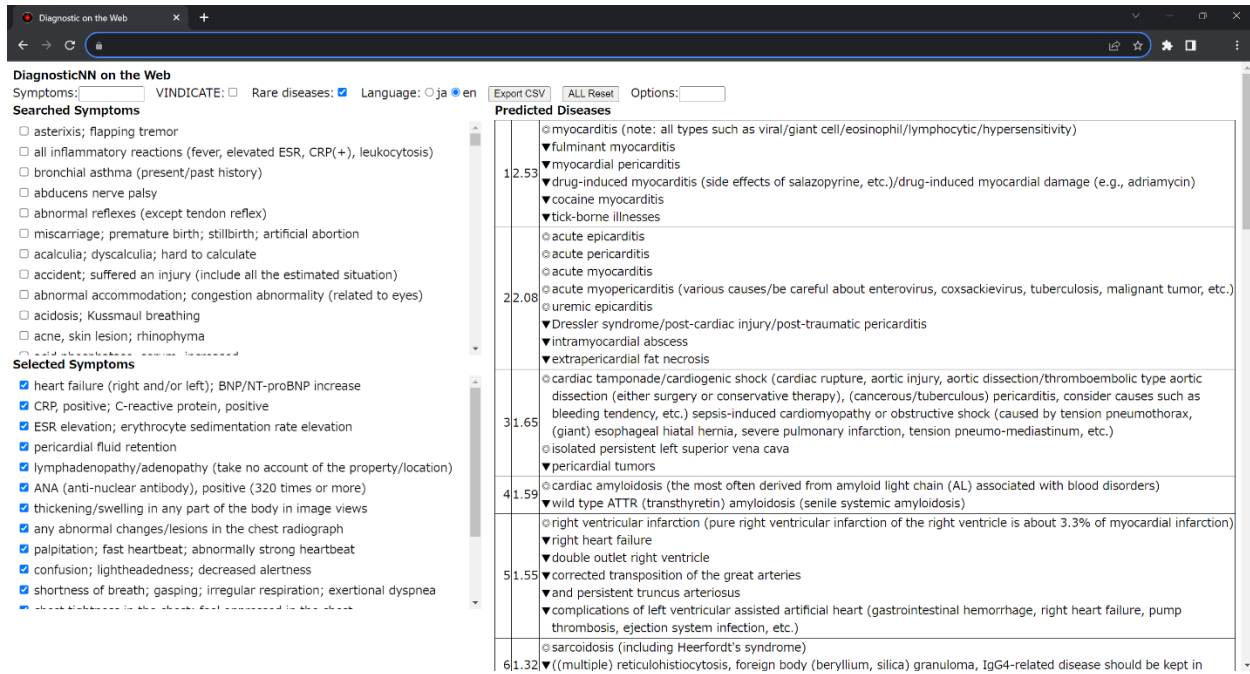

73

74 **Fig 1 Screen image of our Clinical Decision Support System**

75 Case citation: (6)

76

77 CDSSs with similar aims and features are available worldwide. (7), (8), (9), (10)

78

79 Clinical Decision Support System and Learning To Rank

80 The prediction model of our CDSS uses Neural Network (NN) + Learning To Rank (LTR).

81 Physicians' DDX and machines' LTR are remarkably similar. (2)

82

83 Explainable AI

84 Explainable AI (XAI) aims to help humans accept the AI's behaviors.

85 The key points are interpretability and explainability. (11)

86 XAI has a variety of methods. (12), (13), (See: S Table 2 )

87

88 Clinical Decision Support System and Explainable AI

89 Poor interpretability and explainability of CDSS are significant problems in medical ethics. This problem  
90 has severe and far-reaching consequences for personal and public health. (14)

91 The XAI for CDSS has a variety of requirements. (15), (See: S Table 3)

92 XAI research in medicine is focused on image diagnosis and less on differential diagnosis. (16)

93 Research on XAI with CDSS for a single disease was reported about "Type 1 diabetes + SHAPE." (17)  
94 A little research on XAI with CDSS for multiple diseases was reported.  
95 No research on XAI to support Evidence-Based Medicine (EBM) was reported.

96 This manuscript proposes the Evidence-based XAI model for CDSSs.  
97 This model supports the physicians' DDx with evidence.

98

99

100 Design

101 Objective

102 The aims of this article's XAI model are as follows:

103 - Requests from medical professionals:

104 Show evidence of predicted diseases by CDSS.

105 - Response from the XAI:

106 Evidence is the case data of this medical literature.

107

108 Technical background for XAI

109 The AI techniques used for implementation are as follows:

110 1) Example-based explanations

111 2) Surrogate model

112 3) K-Nearest Neighbors

113 Based on the XAI requirements for CDSS, we selected these techniques.

114

115 Example-based explanations

116 Example-based explanations explain each predicted data.

117 The explanation is the identified instances of the training data contributing to the predicted data. (12)

118 The features of the Example-based explanations are as follows: (12)

119 1) The simplest XAI method, with interpretability and explainability

120 2) Explain predicted data by identifying instances of the training data contributing to it

121 3) A mostly model-agnostic

122 4) Available only if a human can understand the instance's contents

123 The case data of CDSS is obtained from medical literature.

124 If it can identify instances of the training data (= case data), it can show evidence of the predicted data

125 (= predicted diseases).

126 However, the Neural Network (NN) using the CDSS's prediction model is not adapted to Example-based  
127 explanations.

128

129 Surrogate model

130 The (local) surrogate model explains each predicted data of the main model. (12)

131 The differences between the main and surrogate models are as follows: (12)

- 132 1) The main model is often uninterpretable (black box).  
133 2) The surrogate model is an interpretable and explicable (white box) model.  
134 3) The prediction performance of the surrogate model is lower than that of the main model.  
135 4) The surrogate model's predicted data is not equal to the main model.

136

137 K-Nearest Neighbors

138 The features of the k-Nearest Neighbors (k-NN) are as follows:

- 139 1) The simplest AI method, with interpretability and explainability  
140 2) Support Example-based Explanations by instances of the training data  
141 3) Wide adaptability  
142 a) Non-parametric supervised learning method  
143 b) Pattern matching  
144 c) Various distance and evaluation functions  
145 d) High-dimensional data (ex: varieties of symptoms and diseases)  
146 e) Scarce training data (ex: rare diseases and cases)  
147 4) Prediction performance is lower than that of the NN

148

149 k-Nearest Neighbors Surrogate model for Clinical Decision Support System

150 We propose the k-Nearest Neighbors Surrogate model (k-NN Surrogate model) as the XAI model for  
151 CDSS.

152 Requirements of CDSS and features of k-NN are remarkably adaptable, except for the k-NN's prediction  
153 performance.

154 Requirements of XAI for CDSS and features of Example-based explanations are remarkably adaptable.  
155 The k-NN Surrogate model is a symphony of Example-based explanations, Local surrogate model, and k-  
156 NN.

157 It improves prediction and XAI performance by "Selecting its data closest to the main model."

158 In a typical k-NN use case, the number of neighbors ( $k$ ) is selected by hyperparameter optimization  
159 during the design phase. The value of  $k$  is fixed during the prediction phase.

160 In the k-NN Surrogate model, the value of  $k$  is changed for each prediction. It predicts multiple data with  
161 multiple numbers of neighbors (ex:  $k = 1 - 10$ ). The value of closest  $k$  ( $k_{closest}$ ) is selected by the  
162 evaluation function's value between the main model's predicted data and the surrogate model's  
163 multiple predicted data. This process can closest the surrogate model's predicted data to the main  
164 model. (defined as "Selecting" from now on)

165 By "Selecting," the surrogate model's data (the predicted data and instances of them) are good  
166 surrogates for the main model.

167 k-NN Surrogate model can show evidence of predicted diseases to medical professionals.

168

169



170 Implementation

171 Definitions of data

172 (See: Table 1)

173

174 **Table 1 Definitions of data**

| Variables, Functions, etc.                       | Definitions                                                              |
|--------------------------------------------------|--------------------------------------------------------------------------|
| Case data                                        |                                                                          |
| $X_{train}$                                      | Training data for features                                               |
| $y_{train}$                                      | Training data for targets                                                |
| $X_{test}$                                       | Test data for features                                                   |
| $y_{test}$ ( $y_{true}$ )                        | Test data for targets (True data for targets)                            |
| User's input                                     |                                                                          |
| $X_{in}$                                         | User's Inputted data                                                     |
| Main model                                       |                                                                          |
| $y_{pred} = main\_model.predict(X)$              | The main model's predicted data                                          |
| $ndcg_{nn} = ndcg(y_{true}, y_{pred})$           | The main model's prediction performance                                  |
| Surrogate model                                  |                                                                          |
| $k = 1 - 10$                                     | The number of neighbors                                                  |
| $y_{pred\_k}[] = surrogate\_model.predict(X, k)$ | The surrogate model's predicted data                                     |
| $ndcg\_k1[] = ndcg(y_{true}, y_{pred\_k}[])$     | The surrogate model's prediction performance                             |
| $ndcg\_k2[] = ndcg(y_{pred}, y_{pred\_k}[])$     | The surrogate model's XAI performance                                    |
| $k\_closest = argmax(ndcg\_k2[]) + 1$            | Selecting the surrogate model's predicted data closest to the main model |
| $ndcg\_k1\_closest = ndcg\_k1[k\_closest - 1]$   | The surrogate model's prediction performance with "Selecting"            |
| $ndcg\_k2\_closest = ndcg\_k2[k\_closest - 1]$   | The surrogate model's XAI performance with "Selecting"                   |

175 []: Array starting from 0

176

177 Medical literature, metadata, and case data

178 Medical literature

179 Medical literature is a source of metadata and case data. It includes medical textbooks, original articles,  
 180 case reports, etc. It will be selected carefully for the CDSS's purpose and targets. It is limited to clear  
 181 sources and peer-reviewed content.

182

183 Metadata

184 Metadata is obtained from medical literature by text-mining. It includes bibliographic, disease-related,  
185 and other information.

186

187 Case data

188 Case data is obtained from the metadata by coding. It is used as training and test data for models. It  
189 includes symptoms and diseases.

190 Symptoms include signs and symptoms, laboratory and imaging test results, etc.

191 Diseases include confirmed diseases, differential diseases, and their scores.

192 Case ID can identify and cross-reference between the metadata and the case data. (See: Table 2, Fig 2)

193

194 **Table 2 Example of metadata and case data**

| Case ID                   | C#####                                                      |                       |                      |
|---------------------------|-------------------------------------------------------------|-----------------------|----------------------|
| Metadata                  |                                                             | Case data             |                      |
| <b>Bibliographic</b>      |                                                             |                       |                      |
| Authors                   | Stern S, Cifu A, Altkorn D                                  |                       |                      |
| Title                     | <b><i>Symptom to Diagnosis: An Evidence-Based Guide</i></b> |                       |                      |
| ISBN-13                   | 978-1260121117                                              |                       |                      |
| Pages                     | 1 - 8                                                       | code                  | value                |
| <b>Disease-related</b>    |                                                             |                       |                      |
| <b>Confirmed diseases</b> | <b>Soft tissue: Cellulitis</b>                              | → y                   | d### 10.0 + $\alpha$ |
| Differential diseases     | Skin: Stasis dermatitis                                     |                       | d### 10.0            |
|                           | Calf veins: Distal DVT                                      |                       | d### 10.0            |
| Symptoms                  | Painful left leg edema with erythema                        | → X                   | s### 1               |
|                           | Hypertension                                                |                       | s### 1               |
|                           | Osteoarthritis of the knees                                 |                       | s### 1               |
|                           | Status post cholecystectomy                                 |                       | s### 1               |
|                           | Healing cut on the left foot                                |                       | s### 1               |
|                           | Temperature 37.3°C                                          |                       | s### 1               |
|                           | Diseases to check                                           | Proximal and calf DVT |                      |
| Diseases to exclude       | Venous insufficiency                                        |                       |                      |
|                           | Underlying malignancy                                       |                       |                      |
| Recommendations           | Normal duplex ultrasound scan                               |                       |                      |
|                           | D-dimer assay                                               |                       |                      |

195 Case Citation: (18)

196

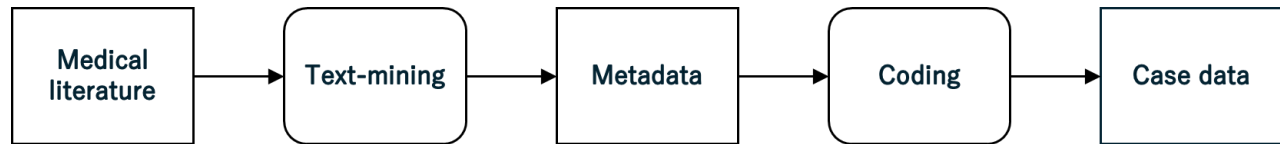

197

198 **Fig 2 Activity diagram of text-mining and coding**

199

200 **Environments for development and execution**

201 The evaluation function for the main (NN) and surrogate (k-NN) models is the Normalized Discounted  
 202 Cumulative Gain (*ndcg*).

203 The loss function for the main model (NN) is the approximate NDCG loss (*ANDCG*). (19) (See: Table 3,  
 204 Table 4)

205

206 **Table 3 Environments for development and execution**

|                            |                          |                            |
|----------------------------|--------------------------|----------------------------|
| Programming language       | Python 3.12.x            |                            |
| Machine learning libraries |                          |                            |
| Main model                 | TensorFlow 2.10.x        | Neural Network (NN)        |
| Surrogate model            | TensorFlow Ranking 0.5.x | Learning To Rank (LTR)     |
| Web application framework  | scikit-learn 1.2.x       | k-Nearest Neighbors (k-NN) |
| JavaScript library         | Flask 2.3.x              |                            |
| Cloud computing services   | Vue.js 3.x               |                            |
|                            | Google Cloud Platform    |                            |
|                            | App Engine               |                            |
|                            | Vertex AI                |                            |
|                            | Firebase Authentication  |                            |

207

208 **Table 4 Configurations of models**

| Models    | Methods                    | Items                | Values, etc.        |
|-----------|----------------------------|----------------------|---------------------|
| Main      | Neural Network (NN)        | Input layer          | 583                 |
|           |                            | Hidden layer         | 1 × 1024            |
|           |                            | Output layer         | 1000                |
|           |                            | Loss functions       | <i>ANDCG</i>        |
|           |                            | Evaluation functions | <i>ndcg, ndcg@k</i> |
| Surrogate | k-Nearest Neighbors (k-NN) | Number of neighbors  | 1 – 10              |
|           |                            | Distance function    | <i>Kendall's W</i>  |
|           |                            | Weight function      | <i>1/distance</i>   |
|           |                            | Evaluation functions | <i>ndcg, ndcg@k</i> |

209

210 Training of the models

211 The main and surrogate models use same datasets. (See: Fig 3)

212

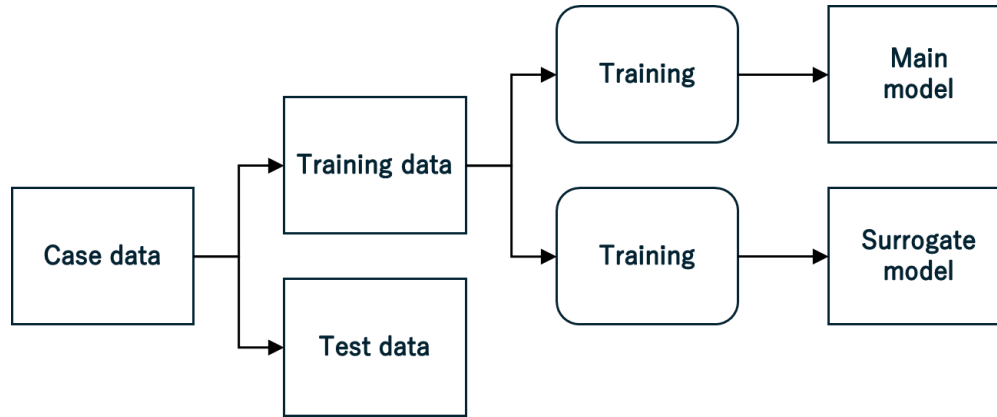

213

214 **Fig 3 Activity diagram of training**

215 (See: S Code 1)

216

217 Prediction and XAI models

218 (See: Fig 4, Fig 5)

219

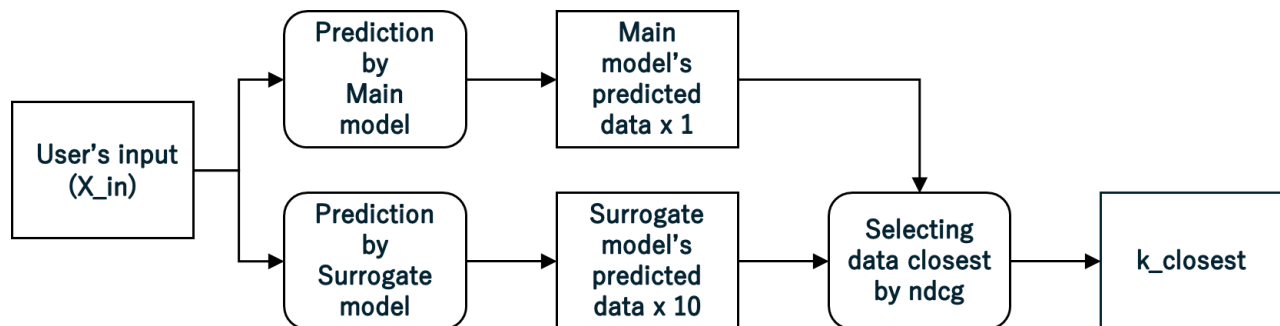

220

221 **Fig 4 Activity diagram of prediction**

222 (See: S Code 1)

223

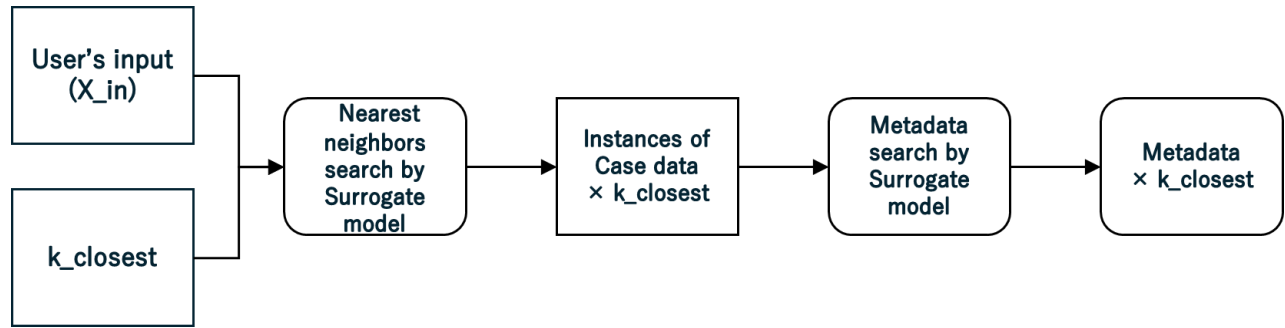

224

225 **Fig 5 Activity diagram of explanation**

226 (See: S Code 1)

227

228

229 Evaluation

230 Datasets for evaluation use k-fold cross-validation of case data. (See: Fig 6)

231

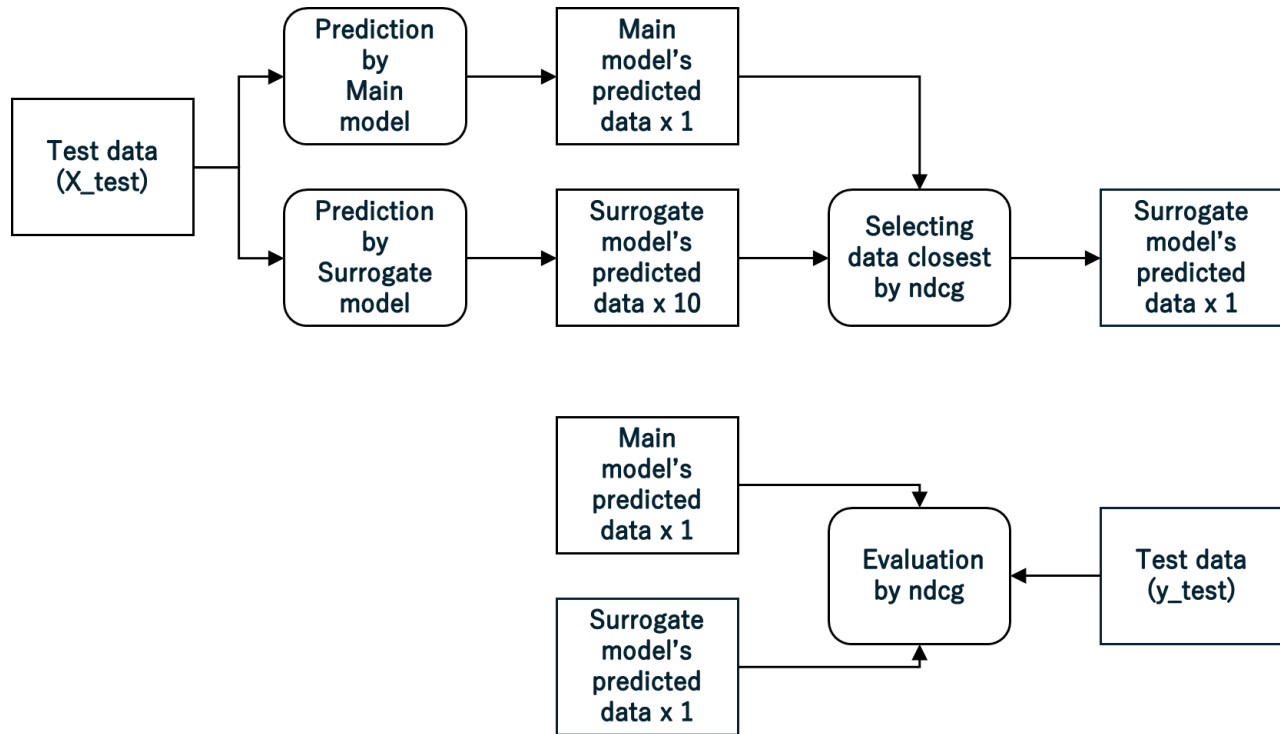

232

233 Fig 6 Activity diagram of evaluation

234 (See: S Code 1)

235

236

237 Results and Discussion

238 Prediction performance

239 The prediction performance of the main and surrogate models was evaluated. (See: Table 5)

240

241 **Table 5 Prediction performance of the main and surrogate models)**

| Models    | Data                   | <i>k</i> | <i>ndcg</i>   | <i>ndcg@1</i> | <i>ndcg@3</i> | <i>ndcg@5</i> | <i>ndcg@10</i> |
|-----------|------------------------|----------|---------------|---------------|---------------|---------------|----------------|
| Main      | <i>ndcg_nn</i>         | ----     | 0.6684        | 0.4609        | 0.5393        | 0.5690        | 0.5988         |
| Surrogate | <i>ndcg_k1[]</i>       | 1        | 0.5348        | 0.3417        | 0.3782        | 0.3986        | 0.4231         |
|           |                        | 2        | 0.5636        | 0.3444        | 0.4122        | 0.4366        | 0.4632         |
|           |                        | 3        | 0.5738        | 0.3554        | 0.4201        | 0.4467        | 0.4754         |
|           |                        | 4        | 0.5784        | <b>0.3597</b> | <b>0.4242</b> | <b>0.4517</b> | 0.4810         |
|           |                        | 5        | 0.5791        | 0.3587        | 0.4240        | 0.4514        | <b>0.4812</b>  |
|           |                        | 6        | <b>0.5791</b> | 0.3581        | 0.4222        | 0.4510        | 0.4812         |
|           |                        | 7        | 0.5778        | 0.3526        | 0.4206        | 0.4484        | 0.4797         |
|           |                        | 8        | 0.5772        | 0.3510        | 0.4190        | 0.4480        | 0.4788         |
|           |                        | 9        | 0.5756        | 0.3487        | 0.4165        | 0.4451        | 0.4766         |
|           |                        | 10       | 0.5735        | 0.3440        | 0.4137        | 0.4421        | 0.4740         |
|           | <i>ndcg_k1_closest</i> | ----     | 0.6264        | 0.4361        | 0.4930        | 0.5158        | 0.5385         |

242

243 The “standalone” surrogate model’s prediction performance is lower than the main model.

244 When using “Selecting,” the surrogate model’s prediction performance is higher than the “standalone”  
245 surrogate model.

246 However, it is lower than the main model.

247

248 XAI performance

249 The XAI performance of the surrogate model was evaluated. (See: Table 6)

250

251

252 **Table 6 XAI performance of the surrogate model**

| Model     | Data                   | <i>k</i> | <i>ndcg</i>   | <i>ndcg@1</i> | <i>ndcg@3</i> | <i>ndcg@5</i> | <i>ndcg@10</i> |
|-----------|------------------------|----------|---------------|---------------|---------------|---------------|----------------|
| Surrogate | <i>ndcg_k2[]</i>       | 1        | 0.8049        | 0.6526        | 0.5975        | 0.5900        | 0.5994         |
|           |                        | 2        | 0.8255        | 0.6775        | 0.6521        | 0.6415        | 0.6429         |
|           |                        | 3        | 0.8335        | 0.6912        | 0.6674        | 0.6601        | 0.6600         |
|           |                        | 4        | 0.8381        | 0.7016        | 0.6763        | 0.6690        | 0.6698         |
|           |                        | 5        | 0.8403        | <b>0.7040</b> | 0.6800        | 0.6731        | 0.6748         |
|           |                        | 6        | 0.8414        | 0.7033        | 0.6812        | 0.6755        | 0.6775         |
|           |                        | 7        | 0.8421        | 0.7038        | 0.6828        | 0.6770        | 0.6790         |
|           |                        | 8        | 0.8424        | 0.7019        | <b>0.6831</b> | 0.6775        | 0.6796         |
|           |                        | 9        | <b>0.8426</b> | 0.7012        | 0.6829        | <b>0.6776</b> | <b>0.6801</b>  |
|           |                        | 10       | 0.8422        | 0.6979        | 0.6812        | 0.6768        | 0.6798         |
|           | <i>ndcg_k2_closest</i> | ----     | 0.8800        | 0.8654        | 0.8101        | 0.7810        | 0.7566         |

253

254 XAI performance is the similarity between the predicted data of the main and surrogate models. The  
 255 similarity is evaluated by the evaluation function.

256 The “standalone” surrogate model’s XAI performance is high.

257 When using “Selecting,” the surrogate model’s XAI performance is higher than the “standalone”  
 258 surrogate model.

259 “Selecting data closest to the main model” improves the surrogate model’s prediction and XAI  
 260 performance.

261

262



## 263 Conclusions

264 The k-NN Surrogate model is a useful XAI model for CDSS.

265 It is a symphony of Example-based explanations, Local surrogate model, and k-NN.

266 k-NN is adapted to high-dimensional data (ex: varieties of symptoms and diseases) and scarce case data

267 (ex: rare diseases and cases).

268 Our CDSS's case data are the same as the evidence in medical literature.

269 For CDSSs with similar aims and features, Example-based explanations are helpful and easy to

270 implement. The k-NN Surrogate model is an Evidence-based XAI for CDSS

271 Uncertainty Quantification (UQ) is an essential issue for AI and CDSS. (20), (21)

272 k-NN is adapted to Conformal Prediction (CP), one of UQ's. (22), (23)

273 The k-NN Surrogate model will also contribute to these improvements in performance.

274 Unlike current commercial Large Language Models (LLMs), Our CDSS shows evidence of the predicted

275 diseases to medical professionals.

276 This emphasis on evidence provides a sense of reassurance and confidence in the system's capabilities.

277 It is important to remember that XAI and the k-NN Surrogate model are beneficial and can change the

278 game for CDSSs.

279

280

281 Additional Information

282 Acknowledgements

283 Not applicable.

284

285 Author Approval

286 This manuscript has been seen and approved by all listed authors.

287 This manuscript has not been accepted or published by a journal.

288

289 Competing Interests

290 The authors have declared no competing interest.

291

292 Declarations

293 1) I have the right to post this manuscript and confirm that all authors have assented to posting of the  
294 manuscript and inclusion as authors.

295 2) I confirm all relevant ethical guidelines have been followed, and any necessary IRB and/or ethics  
296 committee approvals have been obtained.

297 The study does not describe the use of any human data, samples, or any research involving human  
298 subjects.

299 3) I confirm that all necessary patient/participant consent (including consent to publish) has been  
300 obtained and the appropriate institutional forms have been archived.

301 I confirm that any patient/participant/sample identifiers included were not known to anyone (e.g.,  
302 hospital staff, patients or participants themselves) outside the research group so cannot be used to  
303 identify individuals.

304 4) I understand that all clinical trials and any other prospective interventional studies must be  
305 registered with an ICMJE-approved registry, such as ClinicalTrials.gov. I confirm that any such study  
306 reported in the manuscript has been registered and the trial registration ID is provided.

307 5) I am legally responsible for the content of the article.

308 6) I have followed all appropriate research reporting guidelines, such as any relevant EQUATOR  
309 Network research reporting checklist(s) and other pertinent material, if applicable.

310

311 Data Availability Statement and Links:

312 All data produced in the present study are available upon reasonable request to the authors.

313 <https://www.diagnosis.or.jp/>

314 [mailto: ai.diagnosis.2021@gmail.com](mailto:ai.diagnosis.2021@gmail.com)

315

316 Funding Statement:

317 This study did not receive any funding.

318

319

## 320 References

- 321 1. Sutton RT, Pincock D, Baumgart DC, Sadowski DC, Fedorak RN, Kroeker KI. An overview of clinical  
322 decision support systems: benefits, risks, and strategies for success. NPJ Digit Med [Internet].  
323 2020 [cited 2024 Jul 18];3(1). Available from: [https://www.nature.com/articles/s41746-020-](https://www.nature.com/articles/s41746-020-0221-y)  
324 0221-y
- 325 2. Miyachi Y, Ishii O, Torigoe K. Design, implementation, and evaluation of the computer-aided  
326 clinical decision support system based on learning-to-rank: collaboration between physicians and  
327 machine learning in the differential diagnosis process. BMC Med Inform Decis Mak [Internet].  
328 2023 [cited 2024 Jul 18];23(1). Available from:  
329 <https://bmcmmedinformdecismak.biomedcentral.com/articles/10.1186/s12911-023-02123-5>
- 330 3. Miyachi Y, Ishii O, Torigoe K. Can AI Clinical Decision Support System show evidence?: Explainable  
331 AI in collaboration between Neural Network and Surrogate model for Learning to Rank. In: The  
332 43rd Joint Conference on Medical Informatics [Internet]. 2023 [cited 2024 Jul 6]. Available from:  
333 [https://jglobal.jst.go.jp/detail?JGLOBAL\\_ID=202402210603144321](https://jglobal.jst.go.jp/detail?JGLOBAL_ID=202402210603144321)
- 334 4. Miyachi Y, Ishii O, Torigoe K. Can AI Clinical Decision Support System show Evidence and  
335 Humility?: Fusion of XAI and UQ with Surrogate model. In: The 38th Annual Conference of the  
336 Japanese Society for Artificial Intelligence [Internet]. 2024 [cited 2024 Jul 18]. Available from:  
337 [https://www.jstage.jst.go.jp/article/pjsai/JSAI2024/0/JSAI2024\\_2A1GS1004/\\_article/-char/en](https://www.jstage.jst.go.jp/article/pjsai/JSAI2024/0/JSAI2024_2A1GS1004/_article/-char/en)
- 338 5. The Society for Computer-aided Clinical Decision Support System. DiagnosticNN on the Web  
339 [Internet]. [cited 2023 Aug 6]. Available from: <https://www.diagnosis.or.jp/>
- 340 6. Kratka A, Tedrow UB, Mitchell RN, Miller AL, Loscalzo J. A Stormy Heart. New England Journal of  
341 Medicine [Internet]. 2023 [cited 2024 Jul 18];388(1). Available from:  
342 <https://www.nejm.org/doi/full/10.1056/NEJMcps2116690>
- 343 7. Isabel Healthcare. Isabel Healthcare: Differential Diagnosis Tool [Internet]. [cited 2024 Jul 6].  
344 Available from: <https://www.isabelhealthcare.com/>
- 345 8. BraineHealth. Diagnosio | Intelligent healthcare for all [Internet]. [cited 2024 Jul 6]. Available  
346 from: <https://www.diagnosio.com/>
- 347 9. The Japanese Society of Internal Medicine. J-CaseMap [Internet]. [cited 2023 Aug 6]. Available  
348 from: <https://www.naika.or.jp/j-casemap/>
- 349 10. Database Center for Life Science. PubCaseFinder [Internet]. [cited 2023 Aug 6]. Available from:  
350 <https://pubcasefinder.dbcls.jp/>

- 351 11. Gunning D, Aha DW. DARPA's explainable artificial intelligence program. *AI Mag* [Internet]. 2019  
352 [cited 2024 Jul 18];40(2). Available from:  
353 <https://onlinelibrary.wiley.com/doi/full/10.1609/aimag.v40i2.2850>
- 354 12. Molnar C. *Interpretable Machine Learning: A Guide for Making Black Box Models Explainable*  
355 [Internet]. [cited 2023 Aug 6]. Available from: [https://christophm.github.io/interpretable-ml-](https://christophm.github.io/interpretable-ml-book/)  
356 [book/](https://christophm.github.io/interpretable-ml-book/)
- 357 13. Burkart N, Huber MF. A survey on the explainability of supervised machine learning [Internet].  
358 Vol. 70, *Journal of Artificial Intelligence Research*. 2021 [cited 2024 Jul 18]. Available from:  
359 <https://dl.acm.org/doi/10.1613/jair.1.12228>
- 360 14. Amann J, Blasimme A, Vayena E, Frey D, Madai VI. Explainability for artificial intelligence in  
361 healthcare: a multidisciplinary perspective. *BMC Med Inform Decis Mak* [Internet]. 2020 [cited  
362 2024 Jul 18];20(1). Available from:  
363 <https://bmcmedinformdecismak.biomedcentral.com/articles/10.1186/s12911-020-01332-6>
- 364 15. Ploug T, Holm S. The four dimensions of contestable AI diagnostics- A patient-centric approach to  
365 explainable AI. *Artif Intell Med* [Internet]. 2020 [cited 2024 Jul 18];107. Available from:  
366 <https://www.sciencedirect.com/science/article/pii/S0933365720301330>
- 367 16. National Library of Medicine. PubMed [Internet]. [cited 2024 Jul 6]. Available from:  
368 <https://pubmed.ncbi.nlm.nih.gov/>
- 369 17. Prendin F, Pavan J, Cappon G, Del Favero S, Sparacino G, Facchinetti A. The importance of  
370 interpreting machine learning models for blood glucose prediction in diabetes: an analysis using  
371 SHAP. *Sci Rep* [Internet]. 2023 [cited 2024 Jul 18];13(1). Available from:  
372 <https://www.nature.com/articles/s41598-023-44155-x>
- 373 18. Stern S, Cifu A, Altkorn D. *Symptom to Diagnosis* [Internet]. Vol. 1, McGraw-Hill Education. 2015  
374 [cited 2024 Jul 10]. Available from: [https://www.mheducation.com/highered/product/symptom-](https://www.mheducation.com/highered/product/symptom-diagnosis-evidence-based-guide-fourth-edition-stern-alkorn/9781260121117.html)  
375 [diagnosis-evidence-based-guide-fourth-edition-stern-alkorn/9781260121117.html](https://www.mheducation.com/highered/product/symptom-diagnosis-evidence-based-guide-fourth-edition-stern-alkorn/9781260121117.html)
- 376 19. Bruch S, Zoghi M, Bendersky M, Najork M. Revisiting approximate metric optimization in the age  
377 of deep neural networks. In: *SIGIR 2019 - Proceedings of the 42nd International ACM SIGIR*  
378 *Conference on Research and Development in Information Retrieval* [Internet]. 2019 [cited 2024  
379 Jul 18]. Available from: <https://dl.acm.org/doi/10.1145/3331184.3331347>
- 380 20. Seoni S, Jahmunah V, Salvi M, Barua PD, Molinari F, Acharya UR. Application of uncertainty  
381 quantification to artificial intelligence in healthcare: A review of last decade (2013–2023)  
382 [Internet]. Vol. 165, *Computers in Biology and Medicine*. 2023 [cited 2024 Jul 18]. Available from:  
383 <https://www.sciencedirect.com/science/article/pii/S001048252300906X>

- 384 21. Vazquez J, Facelli JC. Conformal Prediction in Clinical Medical Sciences [Internet]. Vol. 6, Journal  
385 of Healthcare Informatics Research. 2022 [cited 2024 Jul 18]. Available from:  
386 <https://link.springer.com/article/10.1007/s41666-021-00113-8>
- 387 22. Papadopoulos H, Vovk V, Gammerman A. Regression conformal prediction with nearest  
388 neighbours. Journal of Artificial Intelligence Research [Internet]. 2011 [cited 2024 Jul 18];40.  
389 Available from: <https://doi.org/10.1613/jair.3198>
- 390 23. Boström H, Johansson U, An Nguyen K, Luo Z, Carlsson L. crepes: a Python Package for  
391 Generating Conformal Regressors and Predictive Systems [Internet]. Vol. 179, Proceedings of  
392 Machine Learning Research. 2022 [cited 2024 Jul 10]. Available from:  
393 <https://proceedings.mlr.press/v179/bostrom22a.html>
- 394
- 395
- 396

397 Supporting information

398 **1) S Table 1 Example of predicted diseases**

399 a) Filename: S\_table\_01\_Example\_of\_the\_predicted\_diseases.pdf

400 b) Case citation: (6)

401 c) Notes: The predicted diseases of the Fig 1.

402

403 **2) S Table 2 List of Explainable Artificial Intelligence methods**

404 a) Filename: S\_table\_02\_List\_of\_XAI\_methods.pdf

405 b) Citation: (12), (13)

406

407 **3) S Table 3 Requirements of Explainable Artificial Intelligence for Clinical Decision Support System**

408 a) Filename: S\_table\_03\_Requirements\_of\_XAI\_for\_CDSS.pdf

409 b) Citation: (15)

410

411 **4) S Code 1 Pseudo code for k-Nearest Neighbors Surrogate model**

412 a) Filename: S\_code\_01\_Pseudo\_code.pdf

413 b) Notes1: The code of the activity diagrams (Fig 3, Fig 4, Fig 5, Fig 6).

414 c) Notes2: No guarantee of executability.

415

416 End
