# Supplementary material for: Evidence-based XAI of clinical decision support systems for differential diagnosis: Design, implementation, and evaluation
Source: bioRxiv or medRxiv preprint supplement (doi:10.1101/2024.07.18.24310609), 2024-09-13
Supplement: Supplementary file [file media-1.pdf]

## Example of predicted diseases

---

|   | Inputted symptoms                                                       |
|---|-------------------------------------------------------------------------|
| a | heart failure (right and/or left); BNP/NT-proBNP increase               |
| b | CRP, positive; C-reactive protein, positive                             |
| c | ESR elevation; erythrocyte sedimentation rate elevation                 |
| d | pericardial fluid retention                                             |
| e | lymphadenopathy/adenopathy (take no account of the property/location)   |
| f | ANA (anti-nuclear antibody), positive (320 times or more)               |
| g | thickening/swelling in any part of the body in image views              |
| h | any abnormal changes/lesions in the chest radiograph                    |
| i | palpitation; fast heartbeat; abnormally strong heartbeat                |
| j | confusion; lightheadedness; decreased alertness                         |
| k | shortness of breath; gasping; irregular respiration; exertional dyspnea |
| l | chest tightness in the chest; feel oppressed in the chest               |
| m | hypertension; have a history of hypertension                            |
| n | ECG (electrocardiogram) abnormalities (take no account of any kinds)    |
| o | tachycardia (almost 100 per minute or more)                             |
| p | increased CPK/CK or CK-MB (CK; creatin kinase); increased troponin T    |

---

| Ranking | predicted diseases                                                                                                                                                                                                                                                                                                                                                                                                                                                                                                                                                                                                                                                                                |
|---------|---------------------------------------------------------------------------------------------------------------------------------------------------------------------------------------------------------------------------------------------------------------------------------------------------------------------------------------------------------------------------------------------------------------------------------------------------------------------------------------------------------------------------------------------------------------------------------------------------------------------------------------------------------------------------------------------------|
| 1       | <ul style="list-style-type: none"> <li>◎ <b>myocarditis</b> (note: all types such as viral/<b>giant cell</b>/eosinophil/lymphocytic/hypersensitivity)</li> <li>▼ fulminant myocarditis</li> <li>▼ myocardial pericarditis</li> <li>▼ drug-induced myocarditis (side effects of salazopyrine, etc.)/drug-induced myocardial damage (e.g., adriamycin)</li> <li>▼ cocaine myocarditis</li> <li>▼ tick-borne illnesses</li> </ul>                                                                                                                                                                                                                                                                    |
| 2       | <ul style="list-style-type: none"> <li>◎ acute epicarditis</li> <li>◎ acute pericarditis</li> <li>◎ acute myocarditis</li> <li>◎ acute myopericarditis (various causes/be careful about enterovirus, coxsackievirus, tuberculosis, malignant tumor, etc.)</li> <li>◎ uremic epicarditis</li> <li>▼ Dressler syndrome/post-cardiac injury/post-traumatic pericarditis</li> <li>▼ intramyocardial abscess</li> <li>▼ extrapericardial fat necrosis</li> <li>cardiac tamponade/cardiogenic shock (cardiac rupture, aortic injury, aortic dissection/thromboembolic type aortic dissection (either surgery or conservative therapy), (cancerous/tuberculous) pericarditis, consider causes</li> </ul> |
| 3       | <ul style="list-style-type: none"> <li>◎ such as bleeding tendency, etc.) sepsis-induced cardiomyopathy or obstructive shock (caused by tension pneumothorax, (giant) esophageal hiatal hernia, severe pulmonary infarction, tension pneumo-mediastinum, etc.)</li> <li>◎ isolated persistent left superior vena cava</li> <li>▼ pericardial tumors</li> </ul>                                                                                                                                                                                                                                                                                                                                    |

| Ranking | predicted diseases                                                                                                                                                                                                                                                                                                                                                                                                                                                                                                                           |
|---------|----------------------------------------------------------------------------------------------------------------------------------------------------------------------------------------------------------------------------------------------------------------------------------------------------------------------------------------------------------------------------------------------------------------------------------------------------------------------------------------------------------------------------------------------|
| 4       | <ul style="list-style-type: none"> <li>◎ cardiac amyloidosis (the most often derived from amyloid light chain (AL) associated with blood disorders)</li> <li>▼ wild type ATTR (transthyretin) amyloidosis (senile systemic amyloidosis)</li> </ul>                                                                                                                                                                                                                                                                                           |
| 5       | <ul style="list-style-type: none"> <li>◎ right ventricular infarction (pure right ventricular infarction of the right ventricle is about 3.3% of myocardial infarction)</li> <li>▼ right heart failure</li> <li>▼ double outlet right ventricle</li> <li>▼ corrected transposition of the great arteries</li> <li>▼ and persistent truncus arteriosus</li> <li>▼ complications of left ventricular assisted artificial heart (gastrointestinal hemorrhage, right heart failure, pump thrombosis, ejection system infection, etc.)</li> </ul> |
| 6       | <ul style="list-style-type: none"> <li>◎ sarcoidosis (including Heerfordt's syndrome)</li> <li>▼ ((multiple) reticulohistiocytosis, foreign body (beryllium, silica) granuloma, IgG4-related disease should be kept in mind)</li> </ul>                                                                                                                                                                                                                                                                                                      |
| 7       | <ul style="list-style-type: none"> <li>◎ Catecholamine-induced cardiomyopathy (also remind/consider catecholamine secreting glomus tumor, pheochromocytoma, etc.)</li> <li>◎ sometimes stress cardiomyopathy/heart attack syndrome/takotsubo cardiomyopathy</li> </ul>                                                                                                                                                                                                                                                                       |
| 8       | <ul style="list-style-type: none"> <li>◎ pheochromocytoma/pheochromocytoma crisis</li> <li>▼ (malignant, familial) paraganglioma (para-aortic (70%), Zuckerkandl body, cervical, mediastinum, bladder neck, etc.)</li> <li>▼ hereditary pheochromocytoma/paraganglioma syndrome (HPPS)</li> <li>▼ pheochromocytoma-related syndrome</li> <li>▼ primary pigmented nodular adrenocortical disease (PPNAD)</li> <li>▼ (benign, malignant) carotid body tumor</li> </ul>                                                                         |
| 9       | <ul style="list-style-type: none"> <li>◎ thyroid crisis</li> </ul>                                                                                                                                                                                                                                                                                                                                                                                                                                                                           |

---

| Ranking | predicted diseases |                                                                            |
|---------|--------------------|----------------------------------------------------------------------------|
| 10      | ☉                  | pulmonary arterial hypertension (familial/idiopathic)                      |
|         | ▼                  | pulmonary arterial hypertension associated with connective tissue diseases |
|         | ▼                  | pulmonary valve stenosis (regurgitation)                                   |
|         | ▼                  | persistent pulmonary hypertension of the newborn (PPHN)                    |
|         | ▼                  | pregnancy-related (postpartum) pulmonary arterial hypertension             |

---

☉: Common diseases

▼: Rare diseases

Case citation:

Kratka A, Tedrow UB, Mitchell RN, Miller AL, Loscalzo J. A Stormy Heart. *New England Journal of Medicine*. 2024; 388(1).

Available from: <https://www.nejm.org/doi/full/10.1056/NEJMcps2116690>
