# Supplementary material for: Evidence-based XAI of clinical decision support systems for differential diagnosis: Design, implementation, and evaluation
Source: bioRxiv or medRxiv preprint supplement (doi:10.1101/2024.07.18.24310609), 2024-09-13
Supplement: Supplementary file [file media-2.pdf]

## List of Explainable Artificial Intelligence methods

| Types                          | Methods                            |
|--------------------------------|------------------------------------|
| Interpretable Machine Learning | Linear Regressions                 |
|                                | Logistic Regressions               |
|                                | Generalized Linear Models (GLMs)   |
|                                | Generalized Additive Models (GAMs) |
|                                | Decision Tree                      |
|                                | Decision Rules                     |
|                                | RuleFit                            |
|                                | Naive Bayes Classifier             |
|                                | <b>K-Nearest Neighbors (k-NN)</b>  |
|                                |                                    |
| Example-Based Explanations     | Counterfactual explanations        |
|                                | Adversarial examples               |
|                                | Prototypes and Criticisms          |
|                                | Influential Instances              |
|                                | Deletion Diagnostics               |
|                                | Influence Functions                |
|                                | <b>K-Nearest Neighbors (k-NN)</b>  |

| Types                         | Methods                                                                                                                                                                                                                                                                                                                                                                                                        |
|-------------------------------|----------------------------------------------------------------------------------------------------------------------------------------------------------------------------------------------------------------------------------------------------------------------------------------------------------------------------------------------------------------------------------------------------------------|
| Global Model-Agnostic Methods | Interpretable Machine Learning<br>Partial Dependence Plot (PDP)<br>Accumulated Local Effects (ALE) Plot<br>Feature Interaction<br>Functional Decomposition<br>Permutation Feature Importance (PFI)<br>Global Surrogate models<br>Prototypes and Criticisms                                                                                                                                                     |
| Local Model-Agnostic Methods  | Interpretable Machine Learning<br>Example-Based Explanations<br>Partial Dependence (PD)<br>Individual Conditional Expectation (ICE)<br>Local Surrogate models<br>Decision tree surrogate model<br><b>k-NN Surrogate Model</b> *1)<br>Local Interpretable Model-agnostic Explanations (LIME)<br>Counterfactual Explanations<br>Scoped Rules (Anchors)<br>Shapley Values<br>SHapley Additive exPlanations (SHAP) |

---

| Types                         | Methods                                                                                                                                                                     |
|-------------------------------|-----------------------------------------------------------------------------------------------------------------------------------------------------------------------------|
| Neural Network Interpretation | Learned Features<br>Pixel Attribution (Saliency Maps)<br>Detecting Concepts<br>Adversarial examples<br>Influential Instances<br>Deletion Diagnostics<br>Influence Functions |

---

\*1: Add by authors

Citation:

Molnar C. Interpretable Machine Learning: A Guide for Making Black Box Models Explainable.

Available from: <https://christophm.github.io/interpretable-ml-book/>

Burkart N, Huber MF. A survey on the explainability of supervised machine learning. Journal of Artificial Intelligence Research. 2021; Vol. 70. Available from: <https://dl.acm.org/doi/10.1613/jair.1.12228>
