# Supplementary material for: Evidence-based XAI of clinical decision support systems for differential diagnosis: Design, implementation, and evaluation
Source: bioRxiv or medRxiv preprint supplement (doi:10.1101/2024.07.18.24310609), 2024-09-13
Supplement: Supplementary file [file media-3.pdf]

Requirements of Explainable Artificial Intelligence for Clinical Decision Support System

| Types                  |                      | Questions                                                  | Required Explanations                                                              |
|------------------------|----------------------|------------------------------------------------------------|------------------------------------------------------------------------------------|
| Data                   | Types of data        | What types of personal data are used?                      | The decision D was made on the basis of data of type X, Y, Z about you.            |
|                        | Data sources         | Where do your data come from?                              | The decision D was based on data from sources X, Y, Z.                             |
| Bias                   | Training data        | On which data was the AI trained?                          | The decision D was made by a system trained on existing data of type X, Y, Z.      |
|                        | Tagging groups       | Who tagged training data?                                  | The decision D was made by a system trained on data tagged by X, Y, Z.             |
|                        | Tested for bias      | Was training data or AI system tested for bias?            | The decision D was made by a system tested for bias of type X, Y, Z.               |
| Diagnostic Performance | Performance          | What is the performance of the AI system?                  | The decision D was made by a system with a performance of X, Y, Z.                 |
|                        | Performance testing  | How was the performance determined?                        | The decision D was made by a system with a performance determined by tests X,Y, Z. |
|                        | Essential indicators | What are key variables of AI decision-making?              | The key input data resulting in decision D was X, Y, Z.                            |
|                        | Alternatives         | Are alternatives considered?                               | The alternatives to decision D are X, Y, Z with a probability of x, y, z (< d).    |
| Decision               | Longevity            | When is decision reconsidered?                             | The decision D will be reconsidered if conditions X, Y, Z obtain.                  |
|                        | AI involvement       | To what degree is AI making the decision?                  | The decision D involved an AI system with respect to X, Y, Z.                      |
|                        | Human involvement    | To what degree are humans making the decision?             | The decision D was wholly/partly made by health professionals X, Y, Z.             |
|                        | Responsibility       | Who is responsible for the decision?                       | The objective/legal responsibility for decision D is held by X, Y, Z.              |
|                        | <b>Evidence</b> *2)  | <b>What is the evidence on which decision D was based?</b> | <b>The decision D was based on instances X, Y, Z of the training data.</b>         |

\*2: Add by authors

Citation:

Ploug T, Holm S. The four dimensions of contestable AI diagnostics- A patient-centric approach to explainable AI. Artif Intell Med. 2020;107.

Available from: <https://www.sciencedirect.com/science/article/pii/S0933365720301330>
